# Supplementary material
Source: Springer Nature journal article supplement (https://www.springermedizin.de/resource/supplementary/13256_2011_1864_MOESM4_ESM.pdf/9648632)

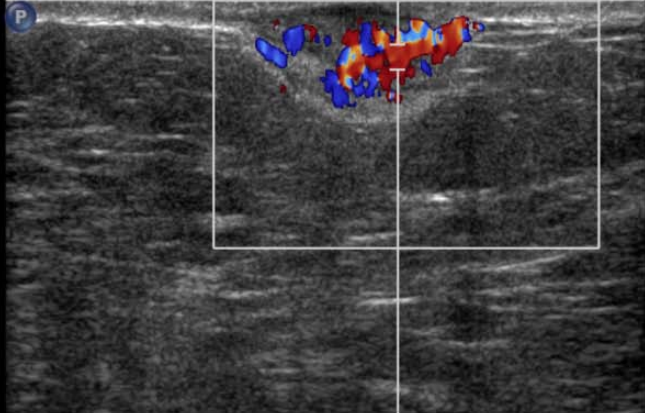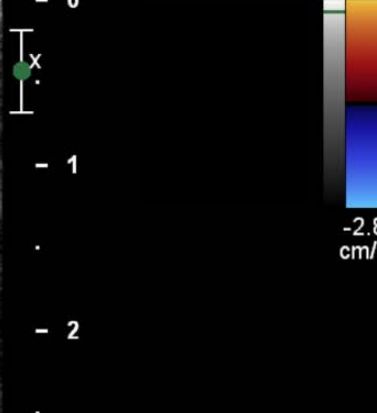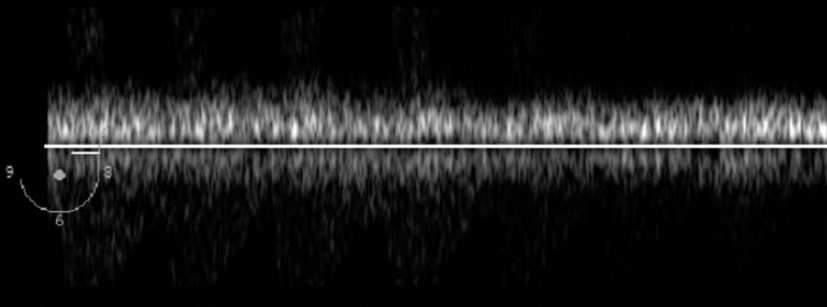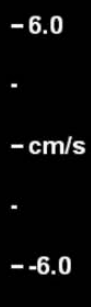

Supplement: MOESM4 [file 9648632]
